# Supplementary material for: A mixed ion-electron conducting network derived from a porous CoP film for stable lithium metal anodes
Source: Royal Society of Chemistry journal article supplement (doi:10.1039/d1qm00212k), 2021-01-01
Supplement: d1qm00212k1.pdf [file d1qm00212k1.pdf]

## Electronic Supplementary Information (ESI)

### **A Mixed Ion-Electron Conducting Network Derived from Porous CoP Film for Stable Lithium Metal Anodes**

Xin Cao<sup>a †</sup>, Qian Wang<sup>b †</sup>, Hangchao Wang<sup>a</sup>, Zhicheng Shang<sup>a</sup>, Jinli Qin<sup>a</sup>, Wen Liu<sup>a \*</sup>, Henghui Zhou<sup>b</sup> and Xiaoming Sun<sup>a</sup>

<sup>a</sup> College of Chemistry, State Key Laboratory of Chemical Resource Engineering, Beijing Advanced Innovation Center for Soft Matter Science and Engineering, Beijing University of Chemical Technology, Beijing 100029, China

<sup>b</sup> College of Chemistry and Molecular Engineering, Peking University, Beijing 100871, China

E-mail: [wenliu@mail.buct.edu.cn](mailto:wenliu@mail.buct.edu.cn)

† These authors contributed equally to this work.

**Note 1: Tafel plot and calculation of the exchange current density ( $i^0$ )**

Tafel plot can be obtained by fitting Tafel equation in the overpotential region with kinetic control (-0.05 to 0.05 V vs Li<sup>+</sup>/Li in our case):

$$\eta = -\frac{2.3RT}{\alpha nF} \lg i^0 + \frac{2.3RT}{\alpha nF} \lg i$$

Where  $\eta$  is the overpotential for Li plating/stripping and  $i$  is the corresponding current density,  $\alpha$  is the energy transfer coefficient, and  $i^0$  is the exchange current density. Fitting the larger overpotential area in the Tafel curve to a straight line, the slope of the straight line is  $2.3RT/\alpha nF$ , and the intercept of the straight line at  $\eta$  equal to 0 is  $\lg i^0$ .

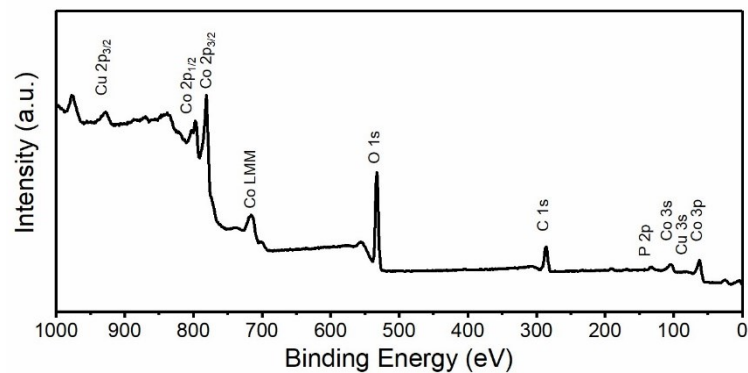

**Figure S1.** XPS spectrum of the porous CoP film prepared by electrochemical deposition.

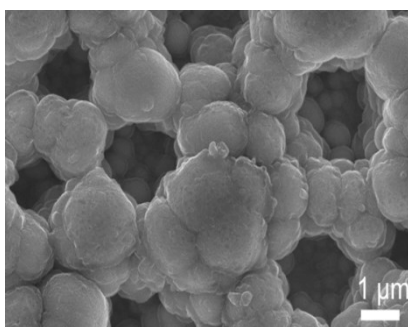

**Figure S2.** SEM image of the porous CoP film electrode after lithiation, which can still maintain its porous structure

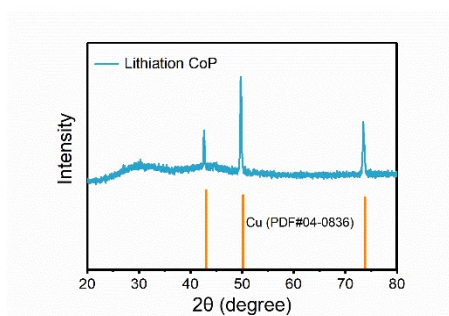

**Figure S3.** XRD pattern of the porous CoP film after lithiation, which only shows the diffraction peaks of Cu substrate, demonstrating the amorphous feature of the lithiation products.

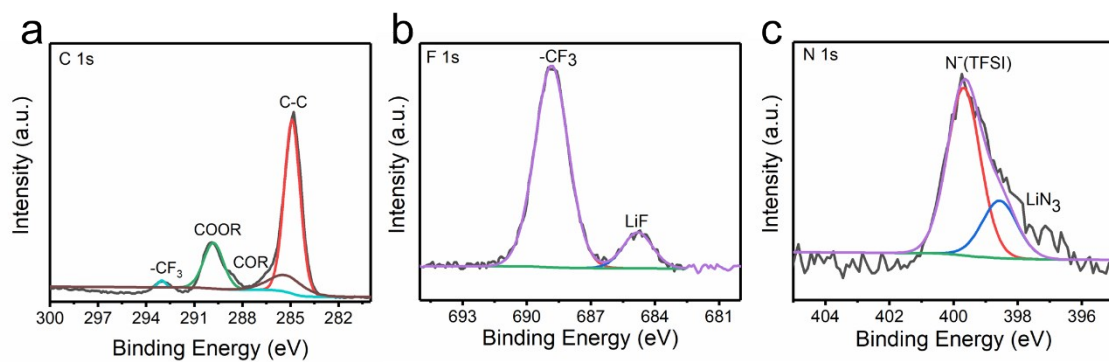

**Figure S4.** XPS spectra of the porous CoP film electrode after lithiation. (a) C 1s, (b) F 1s, and (c) N 1s.

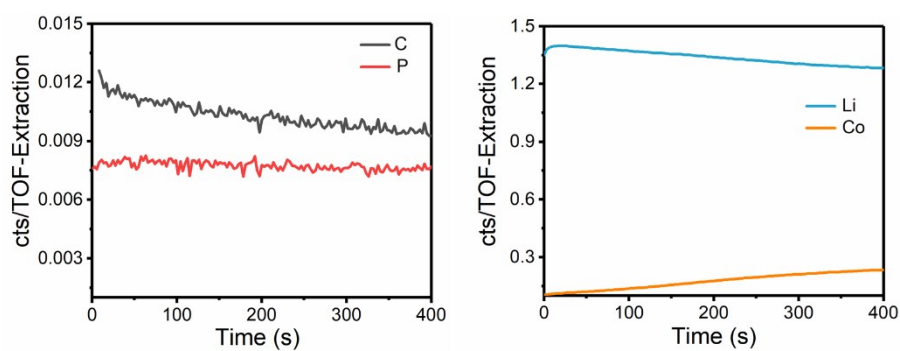

**Figure S5.** TOF-SIMS depth profiles of the C, Li, Co, and P species in the porous CoP film electrodes after discharge to 0.01 V (lithiation).

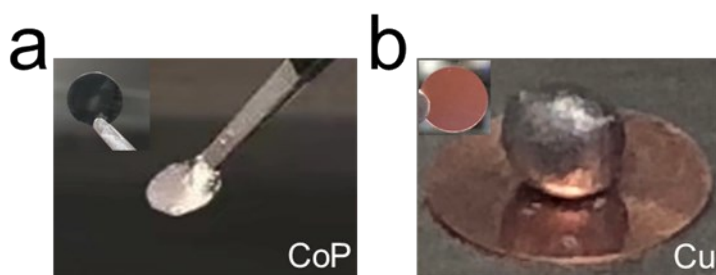

**Figure S6.** Surface wetting of molten Li on (a) porous CoP film (b) Planer Cu.

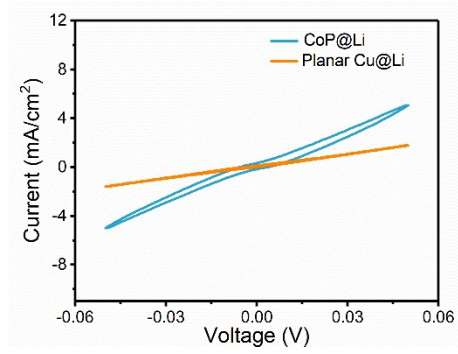

**Figure S7.** The CV curves of planar Cu@Li and CoP@Li anode.

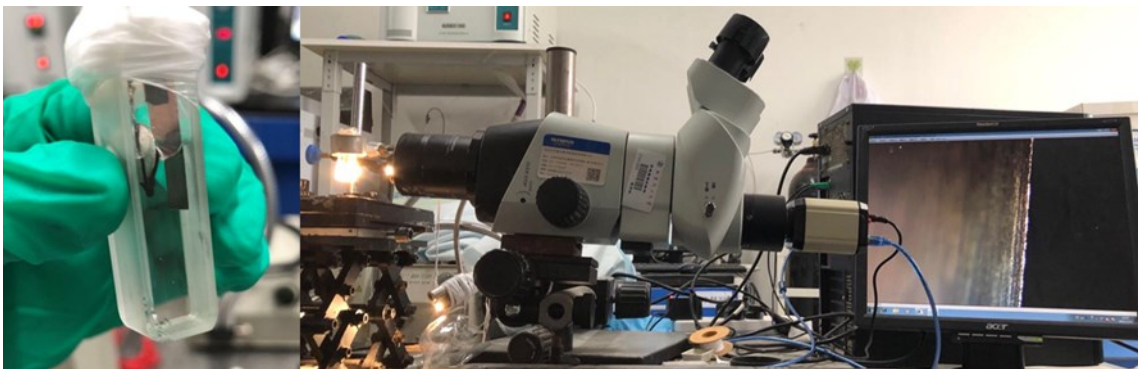

**Figure S8.** Photograph of the battery undergoing in-situ Li plating measurement.

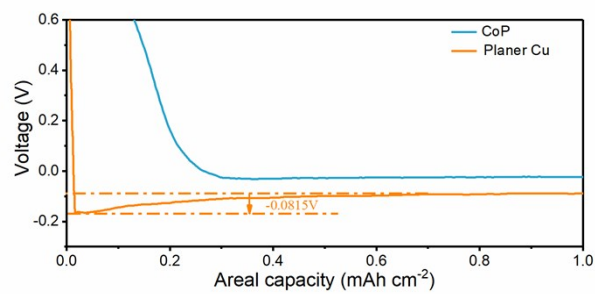

**Figure S9.** Voltage-capacity curves of planar Cu and porous CoP film electrode at current density of  $1 \text{ mA cm}^{-2}$  during the first cycle.

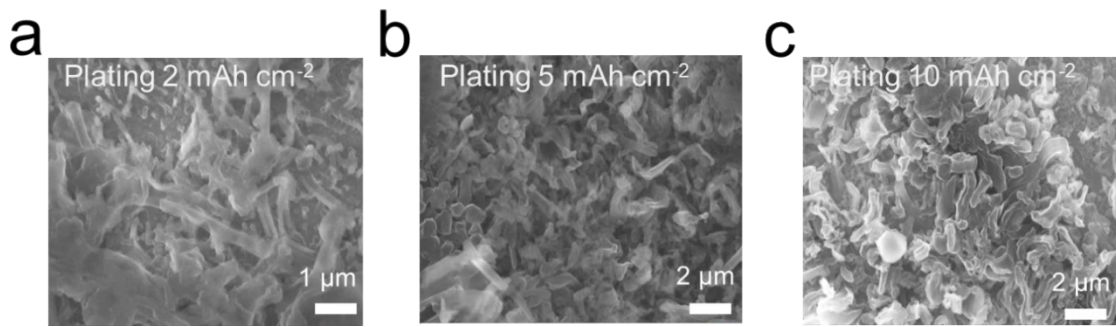

**Figure S10.** SEM images of Li metal deposited on planer Cu electrode at a current density of 1 mA cm<sup>-2</sup> with different capacity. (a) 2 mAh cm<sup>-2</sup>, (b) 5 mAh cm<sup>-2</sup>, (c) 10 mAh cm<sup>-2</sup>

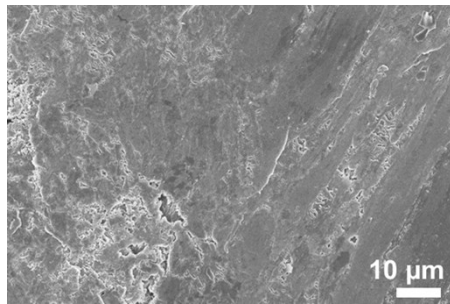

**Figure S11.** SEM image of lithium deposition in the porous CoP host after 50 cycles at the current density of 1 mA cm<sup>-2</sup> and the capacity of 10 mAh cm<sup>-2</sup>.

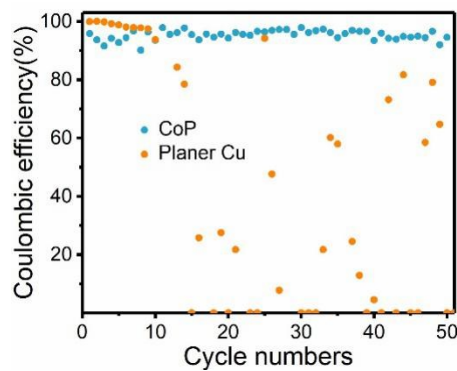

**Figure S12.** Coulombic efficiencies of Li | Cu half cells using planar Cu and porous CoP film as working electrodes with deposition capacity and current density of 5 mA cm<sup>-2</sup> and 1 mAh cm<sup>-2</sup>

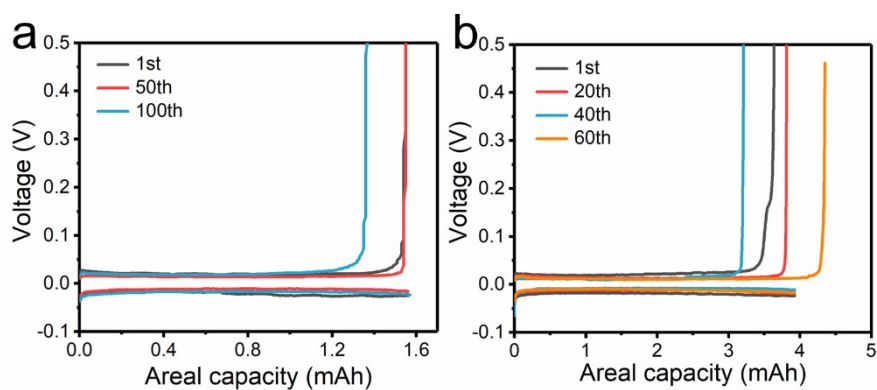

**Figure S13.** Voltage profiles of the planer Cu electrode with the deposition capacity and current density of: (a)  $2 \text{ mAh cm}^{-2}$  and  $1 \text{ mA cm}^{-2}$ , (b)  $5 \text{ mAh cm}^{-2}$  and  $1 \text{ mA cm}^{-2}$ .

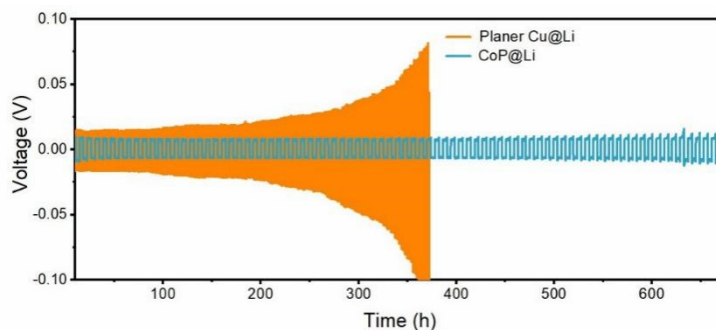

**Figure S14.** Cycling performance of the symmetric cells with fixed capacity of  $2 \text{ mAh cm}^{-2}$  at the current density of  $0.5 \text{ mA cm}^{-2}$  of CoP@Li and Cu@Li.

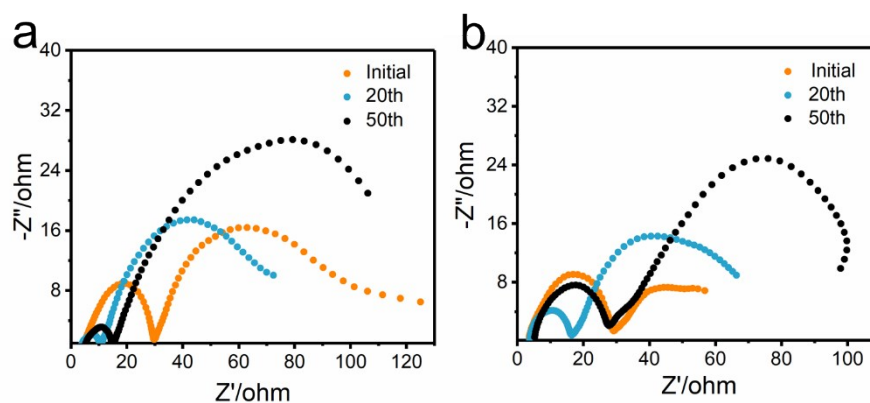

**Figure S15.** EIS plots of Li | Li symmetric cells before and after different cycles with the current density of  $1 \text{ mA cm}^{-2}$  and the capacity of  $1 \text{ mAh cm}^{-2}$ . (a) EIS plots for the CoP@Li | CoP@Li symmetric cells; (b) EIS plots for the planer Cu@Li | planer Cu@Li symmetric cells.



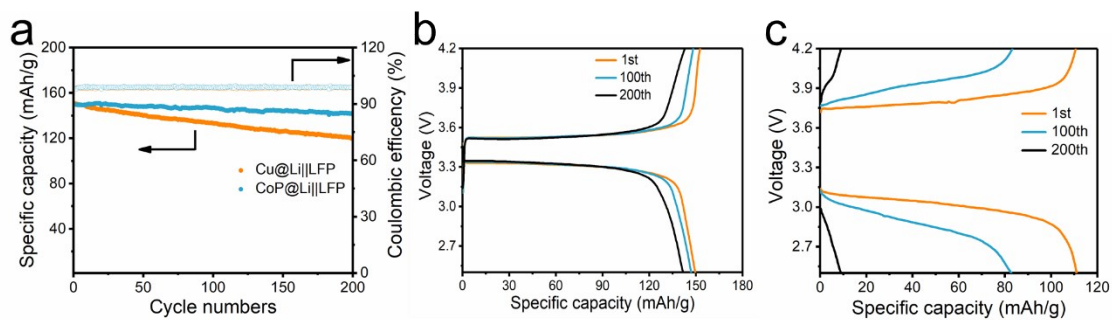

**Figure S16.** Cycling performance of Li metal full cells. (a) The discharge capacity and coulombic efficiency vs. cycle numbers of CoP@Li || LFP and Cu@Li || LFP. (b) Voltage profiles of CoP@Li || LFP cell at 1 C after different cycles. (c) Voltage profiles of the Cu@Li || LFP cell at 5 C after different cycles.

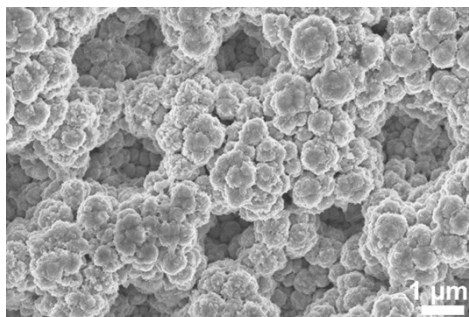

**Figure S17.** SEM images of porous CoP framework after 200 cycles at 1 C in the CoP@Li || LFP cell.

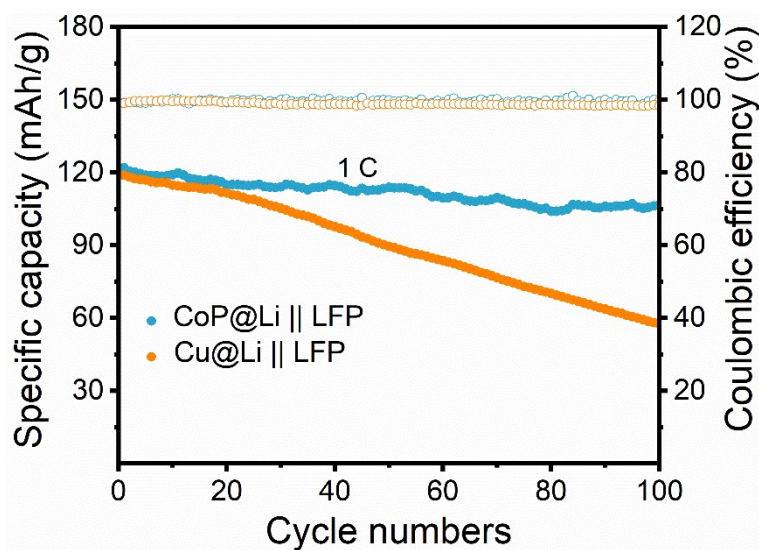

**Figure S18.** Cycling performance of CoP@Li || LFP and Cu@Li || LFP with a low N/P ratio of 1.5 at 1 C.



**Table S1:** Comparison of half-cell electrochemical performance.

| Scaffold                                                                                     | Capacity/mAh cm <sup>-2</sup><br>and<br>Current/mA cm <sup>-2</sup> | Cycle<br>numbers | Coulombic<br>efficiency | References                           |
|----------------------------------------------------------------------------------------------|---------------------------------------------------------------------|------------------|-------------------------|--------------------------------------|
| Cu <sub>3</sub> N nanoparticles<br>incorporating styrene<br>butadiene<br>rubber <sup>1</sup> | 1, 1                                                                | 100              | 97.4%                   | <i>Adv Mater</i>                     |
| 3D porous Cu<br>current collector <sup>2</sup>                                               | 1, 0.5                                                              | 50               | 97%                     | <i>Nat Commun</i>                    |
| Graphitized<br>carbon fibers <sup>3</sup>                                                    | 1, 1                                                                | 50               | 98%                     | <i>Adv Mater</i>                     |
| CuO Nanosheets <sup>4</sup>                                                                  | 1, 0.5                                                              | 180              | 94%                     | <i>Advanced Energy<br/>Materials</i> |
| 3D Cu@Al host <sup>5</sup>                                                                   | 2, 0.5                                                              | 85               | 98.6%                   | <i>Angew Chem</i>                    |
| g-C <sub>3</sub> N <sub>4</sub> @Ni foam <sup>6</sup>                                        | 1, 0.5                                                              | 300              | 98%                     | <i>Advanced Energy<br/>Materials</i> |
| Nanofiber graphene<br>Aerogel host <sup>7</sup>                                              | 3, 1                                                                | 100              | 98.5%                   | <i>Small</i>                         |
| Crumpled graphene<br>balls <sup>8</sup>                                                      | 1, 1                                                                | 50               | 94%                     | <i>Joule</i>                         |
| 3D glass fiber cloths <sup>9</sup>                                                           | 0.5, 1                                                              | 65               | 97%                     | <i>Adv Mater</i>                     |
| 3D gold-modified Ni<br>foam <sup>10</sup>                                                    | 1, 0.5                                                              | 100              | 98%                     | <i>Energy Storage<br/>Mater</i>      |
| 3D conductivity and<br>lithiophilicity gradients<br>host <sup>11</sup>                       | 2, 0.5                                                              | 350              | 97%                     | <i>Nat Commun</i>                    |
| This work                                                                                    | 2,1                                                                 | 250              | 98.63%                  |                                      |
|                                                                                              | 5,1                                                                 | 80               | 98.4%                   |                                      |
|                                                                                              | 10,1                                                                | 50               | 97.92%                  |                                      |
|                                                                                              | 1,5                                                                 | 50               | 95.4%                   |                                      |

## References:

- 1 Y. Liu, D. Lin, P. Y. Yuen, K. Liu, J. Xie, R. H. Dauskardt, et al., An Artificial Solid Electrolyte Interphase with High Li-Ion Conductivity, Mechanical Strength, and Flexibility for Stable Lithium Metal Anodes, *Adv Mater*, 2017, **29**, 1605531 ;
- 2 C. P. Yang, Y. X. Yin, S. F. Zhang, N. W. Li and Y. G. Guo, Accommodating lithium into 3D current collectors with a submicron skeleton towards long-life lithium metal anodes, *Nat Commun*, 2015, **6**, 8058;
- 3 S. H. Wang, Y. X. Yin, T. T. Zuo, W. Dong, J. Y. Li, J. L. Shi, et al., Stable Li Metal Anodes via Regulating Lithium Plating/Stripping in Vertically Aligned Microchannels, *Adv Mater*, 2017, **29**, 1703729 ;
- 4 C. Zhang, W. Lv, G. Zhou, Z. Huang, Y. Zhang, R. Lyu, et al., Vertically Aligned Lithiophilic CuO Nanosheets on a Cu Collector to Stabilize Lithium Deposition for Lithium Metal Batteries, *Advanced Energy Materials*, 2018, **8**, 1703404 ;
- 5 H. Ye, Z. J. Zheng, H. R. Yao, S. C. Liu, T. T. Zuo, X. W. Wu, et al., Guiding Uniform Li Plating/Stripping through Lithium-Aluminum Alloying Medium for Long-Life Li Metal Batteries, *Angew Chem Int Ed Engl*, 2019, **58**, 1094-1099;
- 6 Z. Lu, Q. Liang, B. Wang, Y. Tao, Y. Zhao, W. Lv, et al., Graphitic Carbon Nitride Induced Micro-Electric Field for Dendrite-Free Lithium Metal Anodes, *Advanced Energy Materials*, 2019, **9**, 1803186;
- 7 C. Zhao, C. Yu, S. Li, W. Guo, Y. Zhao, Q. Dong, et al., Ultrahigh-Capacity and Long-Life Lithium-Metal Batteries Enabled by Engineering Carbon Nanofiber-Stabilized Graphene Aerogel Film Host, *Small*, 2018, **14**, e1803310;
- 8 S. Liu, A. Wang, Q. Li, J. Wu, K. Chiou, J. Huang, et al., Crumpled Graphene Balls Stabilized Dendrite-free Lithium Metal Anodes, *Joule*, 2018, **2**, 184-193;
- 9 X. B. Cheng, T. Z. Hou, R. Zhang, H. J. Peng, C. Z. Zhao, J. Q. Huang, et al., Dendrite-Free Lithium Deposition Induced by Uniformly Distributed Lithium Ions for Efficient Lithium Metal Batteries, *Adv Mater*, 2016, **28**, 2888-2895;
- 10 X. Ke, Y. Liang, L. Ou, H. Liu, Y. Chen, W. Wu, et al., Surface engineering of commercial Ni foams for stable Li metal anodes, *Energy Storage Materials*, 2019, **23**, 547-555;

- 11 J. Pu, J. Li, K. Zhang, T. Zhang, C. Li, H. Ma, et al., Conductivity and lithiophilicity gradients guide lithium deposition to mitigate short circuits, *Nat Commun*, 2019, **10**, 1896;
